# 1                    **Insights from *Bacillus anthracis* strains isolated from** 2                    **permafrost in the tundra zone of Russia**

3                    A short title: *Bacillus anthracis* strains from the tundra zone of Russia

4                    Timofeev V<sup>1\*</sup>, Bahtejeva I<sup>1</sup>, Mironova R<sup>1</sup>, Titareva G<sup>1</sup>, Lev I<sup>1</sup>, Christiany, D<sup>2</sup>, Borzilov  
5                    A<sup>1</sup>, Bogun A<sup>1</sup>, Vergnaud G<sup>2\*\*</sup>.

6

7                    1 - State Research Center for Applied Microbiology & Biotechnology» (FBIS SRCAMB),  
8                    Russia

9                    2 - Institute for Integrative Biology of the Cell (I2BC), CEA, CNRS, Univ. Paris-Sud,  
10                    Université Paris-Saclay, 91198, Gif-sur-Yvette cedex, France

11

12                    \* corresponding author

13                    E-mail: [timofeev\\_vitalii@mail.ru](mailto:timofeev_vitalii@mail.ru)

14                    \*\* corresponding author

15                    E-mail: [gilles.vergnaud@u-psud.fr](mailto:gilles.vergnaud@u-psud.fr)

16                    **Keywords:** *Bacillus anthracis*; tundra region; MLVA-genotyping; whole  
17                    genome SNP analysis

18

## 19                    **Abstract**

20                    This article describes *Bacillus anthracis* strains isolated during an outbreak of anthrax on  
21                    the Yamal Peninsula in the summer of 2016 and independently in Yakutia in 2015. A common  
22                    feature of these strains is their conservation in permafrost, from which they were extracted either  
23                    due to the thawing of permafrost (Yamal strains) or as the result of paleontological excavations  
24                    (Yakut strains). All strains isolated on the Yamal share an identical genotype belonging to lineage

25 B.Br.001/002, pointing to a common source of infection in a territory over 250 km in length. In  
26 contrast, during the excavations in Yakutia, three genetically different strains were recovered from  
27 a single pit. One strain belongs to B.Br.001/002, as the Yamal strains. Despite the remoteness of  
28 Yamal from Yakutia, whole genome sequence analysis showed that the B.Br.001/002 strains are  
29 very closely related. The two other strains contribute to two different branches of A.Br.008/011,  
30 one of the remarkable polytomies described so far in *B. anthracis* population. The geographic  
31 distribution of the strains belonging to this polytomy is suggesting that this polytomy emerged in  
32 the thirteenth century, in combination with the constitution of a unified Mongol empire extending  
33 from China to Eastern Europe. We propose an evolutionary model for *B. anthracis* recent evolution  
34 in which the B lineage spread throughout Eurasia and was subsequently replaced by the A lineage  
35 except in some geographically isolated areas.

36 **Funding.** This work is supported by the Sectoral Scientific Program «Problem-oriented  
37 research in the epidemiological surveillance of infectious and parasitic diseases (2016-2020)» of  
38 the Russian Federal Service for Surveillance on Consumer Rights Protection and Human  
39 Wellbeing (Rospotrebnadzor) (<http://www.rospotrebnadzor.ru/>) and by the French Agence  
40 Nationale de la Recherche grant ANR-14-ASMA-0002-02 “Microtype”.

## 41 **Introduction**

42 The etiological agent of the anthrax disease is the gram-positive bacterium *Bacillus*  
43 *anthracis*. A key feature of this microorganism, which largely determines its epidemiological  
44 potential and population structure, is the ability to form endospores, extremely resistant to adverse  
45 environmental factors and able to remain viable for a long time [1-12]. High preservation of spores  
46 explains that even in regions where this disease has not been observed for decades, disease  
47 outbreaks are possible, leading to significant economic damage, the mass mortality of livestock,  
48 and human victims. In addition, due to the high virulence of *B. anthracis*, the stability of  
49 endospores in the environment and the simplicity of cultivation, this bacterium is considered a

50 potential biological weapon or tool for bioterrorism [13, 14], as illustrated by the anthrax  
51 contaminated letters in 2001 in the USA [15].

52 Anthrax is now very rare in most European countries [16] but remains a significant problem  
53 mainly in sub-Saharan Africa and in some regions of Asia [17-20]. Anthrax is endemic in Russia,  
54 where the disease manifests itself as sporadic cases among animals and rare cases of the disease  
55 among the population [21]. The presence of large territories hosting populations of wild and  
56 domestic ungulates creates a favorable context for disease outbreaks of epizootics, and the low  
57 human population density in most parts of the country makes it difficult to conduct anti-epidemic  
58 measures, and to correctly account for anthrax animal burial sites. Past animal burial sites are often  
59 not documented and occasionally corpses were not buried. These burial grounds, and entire  
60 territories, where previously epizootics took place, may become involved in increased economic  
61 activities, which, given the potentially high preservation of *B. anthracis* spores in a cold  
62 environment, could lead to new outbreaks of the disease [22]. Of particular interest in this regard  
63 is the tundra zone of Russia, located between 55 and 68 degrees north latitude.

64 One of the features of this climatic zone is the presence of permafrost. Permafrost is defined  
65 as lithosphere material (soil and sediment) permanently exposed to temperatures  $\leq 0$  °C and  
66 remaining frozen for at least two consecutive years. Permafrost can extend down to more than  
67 1000 m in depth and remain frozen for thousands of years [23, 24]. In permafrost conditions, the  
68 preservation of microorganisms can significantly increase, and thus permafrost is a peculiar  
69 accumulator of microbiota [25, 26]. The preservation of spores of bacilli, including *B. anthracis*,  
70 in the permafrost theoretically should significantly exceed the preservation of microorganisms in  
71 the vegetative form. Consequently, permafrost might allow the discovery of archaic forms of this  
72 microorganism, which could supplement our knowledge of the evolution of the anthrax microbe.  
73 We investigated strains of *B. anthracis* isolated in two tundra zones - during the outbreak of  
74 anthrax in Yamal in the summer of 2016 and during extraction of paleontological material from  
75 the permafrost in Yakutia in 2015.

## 76 **Materials and Methods**

### 77 **Yamal samples**

78 In the summer of 2016 an outbreak of anthrax occurred on the Yamal Peninsula. The  
79 previous outbreak of anthrax was registered in 1941 and the district was officially declared  
80 "anthrax-free" territory of the USSR since 1968. In 2007, the compulsory vaccination of reindeer  
81 was abandoned. On July 16<sup>th</sup> 2016, the United Duty Control Service of the Yamal District was  
82 informed of deer death by private reindeer herders. The deer's deaths began at the estuary of the  
83 Nerosaveyakha River near Lake Pisyoto. Reindeer herders reported that sick animals became  
84 sluggish, began to move slowly, then fell and quickly died. No ulcers or skin lesions could be  
85 detected. On July 17<sup>th</sup> and 18<sup>th</sup>, the Veterinary Service of the Yamal-Nenets Autonomous Area  
86 arrived in the area for clinical examination of animals and autopsy. Pathological material was sent  
87 to the Tyumen Regional Veterinary Laboratory. An autopsy showed cardiac and pulmonary  
88 insufficiency and the preliminary diagnosis was death from a heat stroke as July 2016 had  
89 anomalously hot weather, with temperatures above 35°C. Complementary investigations by  
90 veterinarians sent to reindeer herders camps on July 19-29 led the Tyumen Regional Veterinary  
91 Laboratory to report a suspicion of *B. anthracis* on July 24<sup>th</sup> and to take prophylactic measures  
92 (vaccination and chemotherapy, restrictions on animal movements). Additional samples were sent  
93 to the All-Russian Scientific Research Institute of Veterinary Virology and Microbiology  
94 (ARSRIVVM) in Pokrov (Moscow region).

95 By this time, the disease was observed in three focuses: Lake Pisyoto area,  
96 Novoportovskaya tundra, Evayakha River area. The outbreak sites were separated by distances up  
97 to 250 km, including two water barriers - the Gulf of Ob (width from 30 to 80 km) and the Taz  
98 Estuary (average width is about 25 kilometers).

99 On July 25<sup>th</sup>, a complete laboratory confirmation of presence of *B. anthracis* in samples  
100 taken from dead deer was obtained by ARSRIVVM. A pure culture of *B. anthracis* was isolated

101 from one sample, this strain was called 5875. The Governor of Yamal-Nenets Autonomous District  
102 introduced a quarantine regime in the Yamal district. SRCAMB's and ARSRIVVM's employees  
103 went to Salekhard to sample and to consult local sanitary and medical institutions. Specialists of  
104 the Stavropol Anti-Plague Institute arrived on July 26th.

105 Starting on July 26, arrived experts organized a diagnostic laboratory in the Center for  
106 Hygiene and Epidemiology in the Yamal-Nenets Autonomous District. During the outbreak,  
107 samples from people potentially infected were investigated by this diagnostic laboratory. Medical  
108 authorities decided to hospitalize to Salekhard all children from the outbreak areas even without  
109 visible signs of the disease. People evacuation to temporary camps equipped by that time were  
110 started and preventive antibiotic therapy was applied. SRCAMB's experts flew from Salekhard to  
111 the disease focus in the Lake Pisyoto area to survey the local population and to collect samples.  
112 Until this time, both the local population and veterinarians working in this outbreak area were  
113 skeptical about the possibility of anthrax, and favored the heat shock hypothesis as a number of  
114 other infections harmless for humans could have caused the death of animals weakened by heat.  
115 Furthermore simultaneously with the beginning of vaccination and antibiotic therapy, the  
116 temperature of the infection focus decreased sharply, so there were reasons to believe that the  
117 cessation of new cases of the disease resulted from the lowering of temperature.

118 The typical development of the disease was as follows: a seemingly healthy deer would  
119 become suddenly weak, unable to walk and forced to lay down a few hours later, and would die  
120 after a few additional hours. In most cases the nose was bleeding (sometimes the anus too), rigor  
121 mortis developed at the usual time.

122 SRCAMB's experts took samples of soil, water, blood samples, ears, and lymph nodes of  
123 dead deer. The samples were delivered to Salekhard on July 27<sup>th</sup>, and eventually to SRCAMB on  
124 July 28<sup>th</sup>. On July 29<sup>th</sup>, strain 5875 was sent from ARSRIVVM to SRCAMB. On the same day,  
125 SRCAMB received a strain isolated from a sick person (washed off from skin infection)  
126 subsequently called Yamal\_12 and insects caught by veterinarians working in the outbreak area:

127 nine *Scopeuma stercorarium* and four *Hydrotaca dentipes* from Salekhard. On August 13<sup>th</sup>,  
128 SRCAMB received strain 6063 isolated in epidemic area by ARSRIVVM.

## 129 **Yakutia samples**

130 On August 12, 2015, miners extracting mammoth tusks from the permafrost on the bank  
131 of the river Uyandina in the Abyisk ulus (district) of Yakutia 57 km from the district center Belaya  
132 Gora (“White Mountain”) (latitude N (68.564567), longitude E (144.769827)) found two kittens  
133 of the cave lion *Panthera leo spelaea* frozen in ice. The discovery was remarkable by its  
134 unprecedented degree of preservation - the animals preserved wool and soft tissues. The bodies of  
135 the kittens were transferred to paleontologists. Some samples were taken for microbiological  
136 examination to Institute of Oil and Gas of the Siberian Branch of the Russian Academy of Sciences  
137 in Yakutsk (IPMR SB RAS), the nearest scientific institution. June 01, 2016 an unknown bacillus-  
138 like strain was isolated in the laboratory of geochemistry of caustobioliths of IPMR SB RAS and  
139 sent to the Institute of Genetics and Selections of Industrial Microorganisms (GosNIIgenetika) in  
140 Moscow for identification. September, 01 this strain was identified as *B. anthracis* according to  
141 PCR results. Since this institute is not equipped to carry out work with pathogenic microorganisms  
142 and has no appropriate license, this initial culture was destroyed. September, 21 according to order  
143 of the Chief State Sanitary Doctor of Yakutia, soil samples were collected in paleontological  
144 discovery point. Six separately packed glass jars with soil samples (200 g each), taken from a depth  
145 of 1 to 6 meters with an interval of 1 meter were received by SRCAMB in December 2016.

## 146 **Animal experiments**

### 147 **Ethics statement**

148 All protocols for animal experiments were approved by the State Research Center for  
149 Applied Microbiology and Biotechnology Bioethics Committee (Permits No: VP-2016/4 and VP-  
150 2016/5). They were performed in compliance with the NIH Animal Welfare Insurance #A5476-

151 01 issued on 02/07/2007 and the European Union guidelines and regulations on handling, care,  
152 and protection of laboratory animals

153 ([http://ec.europa.eu/environment/chemicals/lab\\_animals/home\\_en.htm](http://ec.europa.eu/environment/chemicals/lab_animals/home_en.htm)).

154 All used animals were purchased from Laboratory Animals Breeding Center, Shemyakin  
155 and Ovchinnikov Institute of Bioorganic Chemistry, Russia. They were housed in polycarbonate  
156 cages with space for comfortable movement (5 mice per 484 cm<sup>2</sup> cage or 2-3 guinea pigs per 864  
157 cm<sup>2</sup> cage ) and easy access to food and water, under constant temperature (22°C ± 2°C) and  
158 humidity conditions ( 50% ± 10%) and a 12-hour light/12-hour dark cycle.

159 Approved protocols provided scientifically validated humane endpoints, including pre-set  
160 criteria for euthanasia of moribund animals by CO<sub>2</sub> inhalation. Animals were euthanized when  
161 they became lethargic, dehydrated, moribund, unable to rise, or non-responsive to touch. Surviving  
162 animals were euthanized after the observation period.

### 163 **Mice**

164 Six-to-eight-weeks-old BALB/C mice of both genders, weighing 18–20g were used in all  
165 our experiments. They were fed Mouse Mixed Fodder PK-120 (Laboratorkorm, Russia) and  
166 provided tap water *ad libitum* throughout observation period.

167 For virulence evaluation mice were randomly divided in four groups of ten animals and  
168 infected s.c. by doses: 10<sup>0</sup>, 10<sup>1</sup>, 10<sup>2</sup> and 10<sup>3</sup> spores/animal. They were observed for 30 days after  
169 infection.

170 For bioassay we used groups of three mice for each tested sample. Mice were inoculated  
171 subcutaneously with sample dispensed in 0.3 ml of PBS in the inner part of the upper thigh.  
172 Animals were observed during 10 days, after which surviving mice were euthanized. Dead and  
173 euthanized mice were necropsied, and samples of their spleens and livers were inoculated on Petri  
174 dishes with selective anthrax agar (SRCAMB).

### 175 **Guinea pigs**

176 Guinea pigs were used for evaluating the virulence of strains isolated in Yamal epidemic  
177 area. We used five-to-seven-weeks-old animals of both genders, weighing 350–450g. They were  
178 fed Granuled Fodder KK-122 (Laboratorkorm, Russia) and provided tap water *ad libitum* during  
179 the entire experiment (30 days). Guinea pigs were randomly divided in three groups of five animals  
180 and infected s.c. by doses of  $10^2$ ,  $10^3$ ,  $10^4$  spores/animal.

## 181 **Bacterial culture and DNA extraction**

182 For bacterial cultures isolation, cultivation for DNA extraction, and for lecithinase and  
183 hemolytic activity evaluation we used GRM agar, selective anthrax agar, yolk agar and blood agar,  
184 manufactured in SRCAMB, Russia.

185 DNA from field and clinical samples was isolated using «Reagent kit «K-Sorb» for DNA  
186 extraction on microcolumns» (Syntol, Russia). DNA from bacterial cultures was isolated using  
187 GenElute™ Bacterial Genomic DNA Kit (Sigma-Aldrich, USA).

## 188 **PCR analyses**

189 PCR amplifications were run on the CFX96™ Real-Time PCR Detection System (Bio-  
190 Rad Laboratories, Inc, USA). For MLVA and canSNP genotyping we used 2.5× PCRMix M-427  
191 with SYBR-GreenI (Syntol, Moscow, Russia). Primers were synthesized by Syntol, Russia.

192 PCR detection of *B. anthracis* DNA was performed using Real-Time PCR-test systems  
193 «MULTI-FLU» (SRCAMB, Obolensk, Russia) and «OM-screen-anthrax-RT» (Syntol, Moscow,  
194 Russia).

195 MLVA was performed using primers as indicated in Thierry et al. [27], but using monoplex  
196 PCR. PCR products size was evaluated using agarose gel-electrophoresis. The PCR products and  
197 a 20 bp ladder (Bio-Rad, USA) were electrophoresed at 100 V for 240 min on a 32-cm length 3%  
198 agarose gel prepared in 0.5× TBE. The DNA fragments were visualized with ethidium bromide  
199 staining and ultraviolet (254 nm) using the Doc-Print gel documenting system and PhotoCaptMw  
200 software version 99.04 (Vilber Lourmat, Marne-la-Vallée, France). PCR products larger than 600  
201 bp were reanalyzed on 2% agarose gel for better resolution. Also in these few cases we confirmed



202 the size of amplicon using Experion™ Automated Electrophoresis System (BioRad, Hercules,  
203 USA) and by sequencing the fragment.

204 canSNP-genotyping was performed as described in [28].

## 205 **Whole Genome SNP Analysis**

206 Yamal strains DNA was sequenced using the Ion Torrent PGM (Life Technologies, USA).  
207 Ion PGM Reagents 400 Kit (Life Technologies, USA) and Ion 318 Chip Kit (Life Technologies,  
208 USA) were used for sequencing. For each genome, reads were de novo assembled using 2.9  
209 Newbler assembler (Roche).

210 Yakutia strains whole-genome sequencing was performed using the Illumina MiSeq  
211 instrument. DNA libraries were prepared using Nextera DNA Library Preparation Kit. Miseq  
212 Reagent Kit v3 was used for sequencing. For each genome, reads were assembled de novo using  
213 SPAdes v. 3.9 (<http://bioinf.spbau.ru/spades>).

214 Additional sequence read archives were recovered from the European Nucleotide Archive  
215 (ENA) using the enaBrowserTools (<https://github.com/enasequence/enaBrowserTools>) and the  
216 Aspera (Aspera, Inc., USA) high-speed file transfer protocol. Genome assemblies were  
217 downloaded from NCBI and *in silico* converted into 100 bp. sequence reads files with a 50x  
218 coverage using a homemade python script. Sequencing reads were mapped on reference genome  
219 *B. anthracis* Ames ancestor assembly GCA\_000008445 using BioNumerics version 7.6.3. SNPs  
220 were called within BioNumerics using the strict closed dataset option. Minimum spanning trees  
221 were produced allowing the creation of hypothetical missing links.

## 222 **Results**

### 223 **Investigation of the Yamal samples**

224 PCR-diagnostic of soil, water and necropsy samples showed that all samples (n=23) except  
225 soil from the reindeer herding camp (n=5) contained DNA of *B. anthracis*. Set of nutrient medias  
226 - GRM agar, selective anthrax medium, yolk agar, blood agar was inoculated with materials from

227 investigated samples. Typical, *B. anthracis*-like colonies grew from all PCR positive samples,  
228 none from PCR-negative samples. Microscopic studies of these colonies showed the presence of  
229 chains of gram-positive bacillus coated with a capsule. All these bacillus-like colonies were PCR  
230 positive for *B. anthracis*. Some colonies of extraneous microflora grew from these samples. All  
231 insects samples were PCR-negative, and no colonies of *B. anthracis* or extraneous microflora  
232 could be recovered. This negative result is likely due to the use of ethanol for better preservation  
233 of entomological specimens. Consequently, we were unable to confirm or disprove the potential  
234 role of bloodsucking insects in the spreading of the disease over long distances.

235         Soil from the place of death, soil from the camp, water from a nearby lake, cervical lymph  
236 node, blood from the neck region, blood discharge from the anus, and all the clinical samples were  
237 used in a bioassay. All the mice, (except mice infected by soil from the camp) died with symptoms  
238 of anthrax on the second day after infection, their spleen and injection sites contained live anthrax  
239 bacteria as shown by inoculation on Petri dishes.

240         MLVA genotyping was applied in order to establish whether several genotypes circulated  
241 in the epidemic zone. We initially used loci *vrrA*, *Bams03*, *Bams05*, *Bams22*, *Bams44*, and *vntr23*  
242 derived from the MLVA7 scheme proposed by Thierry et al. [27]. This set of loci allowed to  
243 genotype all isolates during one day with a high degree of reliability and proved to be very useful  
244 in conducting an epidemiological investigation, when it is required to minimize the time spent on  
245 analysis, down to hours. Later it turned out that the same MLVA profile was found in all strains  
246 isolated in the summer of 2016 on the Yamal, regardless of the isolation place (Lake Pisyoto area,  
247 Novoportovskaya tundra, Evayakha River area) and of the institution by which the samples were  
248 analyzed (S1 table) even when using 25 loci. Querying the *Bacillus anthracis* v4\_0 MLVA  
249 database at <http://microbesgenotyping.i2bc.paris-saclay.fr> [27] indicates that the Yamal strains  
250 belong to the B-clade [29]. All genotypes present in the MLVA database differed at four loci or  
251 more among the 25 loci. canSNP-genotyping using melt-curves [28] assigned all Yamal strains to  
252 B.Br.001/002 lineage in agreement with the MLVA genotype.

253 The finding of a unique MLVA25 profile suggested that one strain circulated throughout  
254 the epidemic, possibly from a unique source of infection of humans and animals. No strains in  
255 collections of SRCAMB and Stavropol Anti-Plague Institute (Reference Center for the control of  
256 Anthrax) showed the same MLVA25 profile.

257 We selected four strains collected in Lake Pisyoto outbreak area for further work including  
258 whole genome sequencing (table 1).

259 Table 1. *B. anthracis* strains isolated from Yamal outbreak field and clinical samples

| Strain name | Source                               |
|-------------|--------------------------------------|
| Yamal_2     | Cervical lymph node of dead deer     |
| Yamal_8     | Water from a lake                    |
| Yamal_10    | Soil near a dead deer                |
| Yamal_12    | Cutaneous carbuncle of a sick person |

260

261 The strains listed in table 1 were typical for a combination of phenotypic properties, but  
262 the clinical isolate Yamal\_12 initially had lecithinase activity, unlike the other isolates. After two  
263 passages on solid media, this activity was lost.

## 264 Investigation of the Yakoutia samples

265 Several typical *B. anthracis* colonies were cultivated from soil samples from a depth of 2,  
266 3 and 4 meters. The colonies were confirmed as *B. anthracis* by MLVA analysis at seventeen loci  
267 (MLVA17). Three genotypes, subsequently called 3Ya, 4Ya, 5Ya could be distinguished (see S1  
268 table). Genotype 4Ya was equally represented in samples from a depth of 2 and 3 m (Table 2).  
269 Genotypes 3Ya and 4Ya differ at four loci but querying the *B. anthracis* MLVA database indicates  
270 that both are closest to strains belonging to canSNP clade A.Br.008/009. MLVA17 genotype 5Ya  
271 is identical to the Yamal MLVA genotype.

272 Table 2. Yakutia soil samples investigations and strains selected for whole genome  
273 sequencing

| Depth | Detected MLVA genotypes | Representative Strain name genotype |
|-------|-------------------------|-------------------------------------|
| 1m    | none                    | NA*                                 |
| 2m    | 3Ya, 4Ya                | LP50_3Ya                            |

|    |      |          |
|----|------|----------|
| 3m | 4Ya  | LP51_4Ya |
| 4m | 5Ya  | LP53_5Ya |
| 5m | none | NA       |
| 6m | none | NA       |

274 \*NA - not applicable

## 275 **Whole genome SNP analysis**

276 Contrary to our expectations, the recovered MLVA genotypes are very similar to already  
277 know genotypes. Furthermore, the Yamal MLVA genotype is identical to one of the three Yakut  
278 strains genotypes. Finally, we recovered three different MLVA genotypes from the same spot in  
279 Yakutia, whereas the Yamal 2016 outbreak was associated with a unique genotype in spite of its  
280 wide geographic dispersion. One simple explanation for this surprising observation from the Yakut  
281 excavation could be contamination when analyzing the samples in SRCAMB. The resistance of  
282 the endospores is a well-known cause of accidental laboratory contaminations as recently recalled  
283 [30]. In order to investigate this possibility we sequenced four Yamal (Table 1) and three Yakut  
284 (Table 2) strains, together with the four strains in the SRCAMB collection showing the closest  
285 MLVA genotype. We performed a whole genome SNP analysis comparison of these ten genomes  
286 and also included archive reads and assemblies downloaded from EBI-ENA. We used *B. cereus*  
287 strain ISSFR-23F representative of one *B. cereus* lineage closest to *B. anthracis* as outgroup to  
288 root the tree [31]. Figure 1 shows the relative position of the Yamal and Yakut strains within the  
289 global *B. anthracis* population represented by a selection of 50 strains among 650. The longest  
290 genetic distance links the MRCA of the *B. anthracis* species and the *B. cereus* outgroup. The  
291 position of the ancestor of the *B. anthracis* species along this branch is unknown. The four Yamal  
292 strains are identical and belong to B.Br001/002 in agreement with the canSNP typing. The Yakut  
293 Ya5 strain is the closest neighbor but is clearly distinct.

294

295 **Fig 1. Position of the Yamal and Yakutia strains in the global *B. anthracis* phylogeny.**

296 Strains representing the main lineages including the different canSNP lineages were selected. Red  
297 star: the tree is rooted with *B. cereus* strain ISSFR-23F. Each circle is labelled with the

298 corresponding strain name. The color code reflects the canSNP lineage. The very rare lineages  
299 defining the most ancient currently known splits have been found only in North America. The  
300 Yamal and Yakutia strains are arrowed. The number of SNPs constituting each branch is indicated.  
301 A logarithmic scaling was used in order to visualize the shorter branches.

302

303 Figure 2 is a close-up on the group including all available genome sequences assigned to  
304 B.Br.001/002 and sub-lineage B.Br.Kruger. B.Br.001/002 is split in two parts, one part including  
305 the B.Br.Kruger sublineage predominant in South Africa and the other part including strains from  
306 Northern Russia, Estonia and Korea. The “Kruger” group is characterized by relatively long  
307 branches. From the split to the tips of the tree, the “Kruger” group expansion ranges from 256 to  
308 368 SNPs. In contrast, in the same timespan the “Eurasia” group expanded by 60 up to 86 SNPs,  
309 i.e. a ratio of 4.25 between the two groups. This observation may suggest that the “Kruger” clade  
310 is the result of a secondary introduction to South Africa. The Yakut Ya5 and Yamal strains belong  
311 to the “Eurasia” group and are separated by 54 SNPs.

312

313 **Fig 2. Focus on the B.Br001/002 and B.Br.Kruger lineages.** The Ames ancestor  
314 reference genome is used to root the minimum spanning tree. Branch length (number of SNPs) is  
315 indicated. Geographic origin of each strain is displayed when known.

316

317 The two other Yakut strains, Ya3 and Ya4, belong to the Transeurasian radiation TEA  
318 008/011 [32]. TEA 008/011 is a remarkable polytomy currently including seven lineages. Figure  
319 3 displays a minimum spanning tree based on the whole genome SNPs detected among the 75  
320 strains assigned to TEA 008/011. The branches are named as previously proposed [32]. Distances  
321 from root to tips differ by a ratio of 11 among the different lineages. The shortest branch with 17  
322 SNPs represented by a strain from China, is observed in lineage L2\_STI. The longest, with 194  
323 SNPs, is observed in L1\_Heroin. The most represented lineages are L1\_Heroin, L2\_STI and

324 L3\_Tsiankowskii. The L1\_Heroin lineage was previously investigated in detail [33-35].  
325 L1\_Heroin contains one early split, three SNPs from the core of the polytomy. One branch with  
326 75 SNPs is present in China, whereas the other branch is more complex in terms of geographic  
327 origin as it was isolated in many countries. The shortest branch (57 SNPs from red-star root to tip  
328 in Figure 3) within this lineage is defined by a cluster of strains recovered in different European  
329 countries from human patients infected via drug usage. The longest branch is the outcome of a  
330 recent split along the shortest branch. After this split, the relative rate of expansion was 28. The  
331 difference in length is not the result of horizontal gene transfer events, as the associated SNPs do  
332 not show evidence for clustering [36]. The geographic location of the reservoir is uncertain.  
333 Afghanistan is a likely option if heroin contamination occurred as part of the drug production or  
334 initial packaging processes. Other candidate countries are Turkey and Pakistan represented by  
335 strains defined by short lineages, or additional neighbor countries not represented in current *B.*  
336 *anthracis* databases. The L2\_STI lineage contains three deep-branching sublineages. The first is  
337 defined by the Yakut 4Ya strain, the second is present mostly in China, and the third corresponds  
338 to the STI vaccine strain from Russia. The Tsiankowskii vaccine strain, the Sverdlosk 1979 strain  
339 [34], and the Yakutia 3Ya strain which is closest to a strain from Norway belong to lineage  
340 L3\_Tsiankowskii lineage containing a single deep-branching lineage widely spreading in Russia  
341 and Eastern Europe, including Greece, Albania, Bulgaria, Poland. Lineage L4\_Pasteur contains  
342 two deep-branching sublineages, one found in Bulgaria and the other in Italy in addition to the  
343 Pasteur I vaccine strain. Lineages L5 and L6 each contain a single deep branching lineage,  
344 observed in Turkey. The last lineage leads to TEA Br011 corresponding to the A.Br.011/009  
345 polytomy [37, 38] found in France. In summary, eleven deep-branching lineages are detected  
346 within the seven-branch TEA 008/011 polytomy, nine of which with a strong geographic  
347 assignment, to Turkey (2), China (2), Russia (2, including Northern Yakutia, Siberia), Italy,  
348 Bulgaria and France. The root (red star) defined by the branching point of the Ames ancestor  
349 reference strain is located on L3\_Tsiankowskii at a distance of one SNP from the center of the

350 polytomy connecting the six other branches. This might suggest that Europe is the geographic  
351 origin of the A.Br.008/011 polytomy. However this argument is weak and extensive sequencing  
352 of additional A.Br.008/011 strains will be needed to establish the geographic origin of the  
353 polytomy.

354

355 **Fig 3. A.Br008/011 polytomy, minimum spanning tree, logarithmic scale.** The color  
356 coding reflects the lineages within the A.Br.008/011 polytomy using the previously defined  
357 classification [32]. Geographic origin is indicated when known. The root (red star) is defined using  
358 the Ames ancestor reference genome. Two strains representing the A.Br011/009 lineage are  
359 included. The tree is based upon 1844 SNPs, and the level of homoplasia is 0.7% (the size of the  
360 tree is 1858).

361

362 Two representatives from A.Br.011/009 were included in Figure 3, in order to show the  
363 position of the root of the A.Br.011/009 polytomy located at a distance of six SNPs from the root  
364 of the A.Br.008/011 polytomy. Figure 4 shows the structure of the A.Br.011/009 polytomy, using  
365 the fifty-four read archives or genome assemblies assigned to A.Br.011/009. The polytomy  
366 comprises six branches numbered L1 to L6 in agreement with previous reports [37, 38]. The  
367 monophyletic A.Br.WNA lineage exclusively present and predominant in North-America emerged  
368 from A.Br.011/009\_L2 and is represented by four strains in Figure 4 [28, 38-40]. Interestingly, the  
369 WNA lineage is branching from the Canadian strain A0303 which shows the ancestral state for  
370 the A.Br.WNA canSNP, i.e. still belongs to A.Br.011/009 [39]. This is in agreement with the report  
371 by Kenefic et al. demonstrating an introduction of WNA in the USA from Canada, and a  
372 progressive evolution from north to south. The West Africa clade from Guinea and Côte d'Ivoire  
373 [41] is branching out from lineage L2 at the same position as the WNA and Senegal-Gambia [42]  
374 clade. Apart from two Argentinian strains belonging to the L3\_Pasteur II vaccine sublineage and  
375 one strain from the USA defining a recent split with a long branch within lineage L4, all the other

376 A.Br.011/009 strains are from Italy and France. Italian strains define two deep lineages within  
377 lineages L1 and L2, which split at a distance of one SNP from the root of the A.Br.011/009  
378 polytomy. After the split, the length of the expansion is very similar along the French and Italian  
379 sublineages (Fig 4). For instance the total length of the French L2 lineage is 26-33 SNPs, compared  
380 to 24-28 SNPs in the Italian L2 lineage.

381

382 **Fig 4. A.Br011/009 polytomy, minimum spanning tree, logarithmic scale.** The color  
383 coding reflects the lineages within the A.Br.011/009 polytomy using the previously defined  
384 classification [38]. Within L3, strains derived from the Pasteur II vaccine are colored in pink.  
385 Geographic origin is indicated when known. The root (red star) is defined using the Ames ancestor  
386 reference genome.

387

388 Consequently, the analysis of currently available A.Br.011/009 sequencing data  
389 strengthens the previously reported view of the A.Br.011/009 polytomy, characterized by a limited  
390 geographic distribution of the “slowly evolving” lineages contrasting with the very fast expanding  
391 lineages observed in West Africa and North America [38]. After the North American-West African  
392 split shown in Figure 4, French strains from lineage L2 expanded for a further 15 to 22 SNPs when  
393 not including two strains obtained from the Collection de l’Institut Pasteur (CIP) which might have  
394 been extensively cultivated and define slightly longer branches. In contrast, the length observed  
395 towards Côte d’Ivoire-Guinea, Senegal-Gambia, and WNA are 167-177 SNPs, 323-458 SNPs and  
396 112-142 respectively, i.e. ratios of 8 to 20. The currently available data provides evidence for two  
397 independent introductions of *B. anthracis* from the A.Br.011/009 polytomy in North America, one  
398 from the L2 lineage via Canada, and the second one from the L4 lineage. The second introduction  
399 is represented by a unique read archive SRR5811139 derived from a strain collected in New  
400 Hampshire. This second introduction occurred after L4 had already expanded for at least 2/3 of its



401 current length whereas the first introduction from L2 occurred after L2 had expanded for 1/3 of its  
402 current length.

## 403 **Discussion**

### 404 **The Yamal 2016 anthrax outbreak and implications**

405 Anthrax is endemic in most of Russia, including Yamal. At the beginning of the Yamal  
406 colonization by the Russian Empire in the 17-18 centuries, cases of this disease were reported. The  
407 first outbreak was recorded in 1760. From 1898 to 1931, 66 epizootics were described, during  
408 which more than a million deer died. In the 1940s, the whole reindeer livestock was vaccinated.  
409 In subsequent years, the number of vaccinated animals was lower, for example, in the 1960s, from  
410 65 to 82% of the total number of deer was vaccinated. This proved sufficient to prevent epidemics.  
411 Thus, a centuries-old cycle of anthrax circulation in the tundra of the Far North was interrupted  
412 [43].

413 The absence of outbreaks suggested that the soil in the tundra was sanitized and no longer  
414 contained anthrax spores. In 1968, 360 soil samples from places of recorded mass death of  
415 reindeers were examined and no *B. anthracis* strains could be recovered [44]. This suggested that  
416 tundra soil conditions (pH 3-5, humus content lower than 3%) are unfavorable to maintain the  
417 viability of the spores. In 2007, deer vaccinating was stopped. During June-July of 2016, the air  
418 temperature in the Yamal epidemic area in was 5-9 degrees higher than normal, and did not fall  
419 below 18 C. The soil reached a temperature of 25 C at a depth of 10 cm and 7 C at a depth of 1  
420 meter. This was combined with a very small amount of rain precipitation [45]. Apparently such an  
421 anomalous warm climate led to the thawing of permafrost, and viable *B. anthracis* spores could  
422 be exposed to the surface [3, 46].

423 According to the testimony of reindeer herders in epidemic area near Pisyoto lake, herds  
424 from all focus of infection had been driven through the same place in the tundra. The thawing of  
425 permafrost provoked a landslide of a hill on the bank of the river. This could explain the finding

426 of a single MLVA and wgSNP genotype. Unfortunately since all the helicopters in the region were  
427 being used to transport people and cargo, it was not possible to visit and sample the place (in this  
428 region roads are absent; movement is possible only by sledges with a team of reindeers or by  
429 helicopter). Along these lines, two migration ways of the pathogen might be proposed: washing  
430 out of bacterial cells from deep soil layers to the ground surface, or exposure of a deep soil layer  
431 to the surface due to thawing and landslide. At the same time, the reindeers were weakened by the  
432 heat, which could have increased susceptibility to infection. Observations in the focus of the  
433 disease and a survey of veterinarians and reindeer herders gave grounds to assume that infection  
434 could occur not only by spores but also by vegetative cells. In several cases, a sick reindeer could  
435 start recovering and stand on its legs after receiving a single dose of antibiotic, subsequently licked  
436 the muzzle of healthy animals, which fell ill and died within 24 hours.

437         Consequently, we cannot exclude a simultaneous spreading of infection from several  
438 isolated foci triggered by the exceptionally hot weather. A preceding large-scale epizootic, spread  
439 widely in the region and conserved in permafrost in multiple soil foci might explain the observed  
440 genetic homogeneity of the strains collected during the present outbreak. In our opinion, this  
441 alternative is not the most likely. Unfortunately, strains from previous outbreaks were not  
442 preserved in collections. Therefore, there is no way to compare the strain isolated in 2016 with  
443 strains previously circulating in the region, and, accordingly, to precisely estimate the length of  
444 time during which the pathogen spores were stored in the soil. Given that the last outbreak of  
445 anthrax in Yamal was registered in 1941, it is likely that the spores remained viable in the soil for  
446 at least 75 years.

447         Considering the scale of the epidemic and the costs of countering it, the time interval  
448 between the beginning of reindeer disease and the beginning of antiepidemic measures may seem  
449 too large. In the case of a faster response, the epidemic could be less severe. Several factors played  
450 a role in this situation:

451 - Presence of a large number of unvaccinated reindeer (Yamal reindeers population reaches  
452 800 thousand), susceptible to infection and weakened by heat).

453 - Lack of experience in anthrax diagnosing - the last outbreak of anthrax was recorded in  
454 this region in 1941, and local veterinarians had no experience of this infection before 2016.

455 - Nomadic mode of cattle breeding - even a small herd can eat the limited tundra vegetation  
456 very quickly, thus breeders have to drive the herd to another place. Nomadic cattle breeding cover  
457 much larger territories than settled cattle breeding. The migration routes of different herds may  
458 cross each other. In the case of anthrax, this can rapidly increase the epidemic area, and contribute  
459 the infection to herds that migrate through the territories where sick animals were driven.

460 Also the establishment of the scale of the accident and the timely examination of the  
461 corpses was hampered by the fact that reindeer herders migrated and could not always bring dead  
462 deer for inspection. The delay in identifying patients with anthrax was also due to lack of  
463 awareness of the local population about the dangers of anthrax and about its symptoms. Local  
464 populations, even with symptoms of the cutaneous form of this disease, did not pay attention to  
465 them and considered themselves healthy. This situation arose from a set of reasons. The traditional  
466 way of life of reindeer breeders, transport and communication isolation of nomadic reindeer  
467 herders from cities is associated with a more limited access to medical care. The usual high  
468 prevalence of furunculosis prevented timely detection of anthrax affections on the skin.

469 All these factors favored the spreading of the infection before medical and veterinary  
470 organizations were alerted. During a hidden period, the infection may have been carried by  
471 transport (helicopters and ships), along with the goods and people who visited the outbreak, where  
472 the animals infection happened first. Unfortunately, it is not possible to retrace retrospectively the  
473 movement of people and transport between the foci of infection.

474 The occurrence of anthrax outbreaks after a 75-year break demonstrates that the decision  
475 to stop the vaccination was premature, in line with similar independent observations in Georgia  
476 [47]. Permafrost turned out capable to conserve viable microbial spores for a long period and

477 figuratively speaking to be a reservoir of infection. Under favorable climatic conditions, these  
478 spores proved able to migrate to the surface of the soil and initiate new infection cycles.

479 If the Yamal strains were isolated during a large-scale epidemic, then the finding of the  
480 Yakut strains in a seemingly random place is very noteworthy. In the absence of historic record of  
481 anthrax outbreak in this area, there was no reason to expect the finding of *B. anthracis* spores in  
482 the soil. The microbiological investigation was prompted by the paleontological finding of cave  
483 lions leading to the serendipitous finding of *B. anthracis*. Three different genotypes from soil  
484 samples taken from a depth corresponding to the upper layers of permafrost down to four meters  
485 were characterised. One genotype was very close to the Yamal genotype and belongs to the B  
486 cluster of *B. anthracis* whereas the two others belong to the A.Br.011/008 polytomy.

### 487 **Tentatively dating the emergence of the A.Br.011/008 polytomy.**

488 The monophyletic, strictly clonal evolution of *B. anthracis* implies that the whole species  
489 derives from a unique progenitor [48]. Africa is sometimes proposed as being the “cradle” of *B.*  
490 *anthracis* [49]. The strongest argument in favor of such an origin may be the discovery in Africa  
491 of additional *B. cereus* lineages causing an anthrax-like disease [48, 50, 51]. However, this does  
492 not help dating or locating the origin of modern lineages, even when these lineages display a strong  
493 geographic preference. A tentative dating of the Most Recent Common Ancestor (MRCA) of the  
494 *B. anthracis* species to 13,000-27,0000 years was previously proposed based on average mutation  
495 rate and estimates of infection cycles per year [28]. The *B. anthracis* species may be much older  
496 than the MRCA defined by known lineages.

497 The dating of nodes along the *B. anthracis* phylogeny is particularly difficult and  
498 challenging because of the irregularity of its evolution due to its ecology [28, 32, 39]. In contrast  
499 with other pathogens such as *Mycobacterium tuberculosis* [36, 52, 53], branch length does not  
500 correlate with time, as investigated and discussed in detail by [32]. Rather branch length most  
501 likely reflects the number of infection opportunities per year [28] or more rarely a mutator  
502 phenotype [54]. This number is expected to increase when *B. anthracis* encounters a favorable

503 ecological niche. Each split in the tree reflects the colonization of a new ecotype allowing the  
504 fixation of an additional, independent lineage. Usually such a split will result from geographic  
505 spreading, and the new ecotype may be the one with the longest, faster evolving branch, at least  
506 when a significant difference is observed, reflecting the arrival in a new, naive environment. In  
507 this context, polytomies constitute exceptional opportunities to try and propose dating points.  
508 Polytomies result from the sudden colonization of multiple new ecotypes which may reflect  
509 exceptional environmental changes. Such changes may have an anthropic origin and it may be  
510 easier to associate a polytomy with major historical events. Two large polytomies have been  
511 described so far in *B. anthracis* the A.Br.008/011 [32] and the derived A.Br.011/009 polytomies  
512 [37]. They constitute the “TransEurAsia” (TEA) subclade [32].

513         The branching of fast-evolving lineages from the same position within a unique sublineage  
514 of the A.Br.011/009 polytomy towards both West Africa and North America indicated that the  
515 contamination was exported from a geographically limited region having exchanges at the same  
516 time with both continents (Canada, Senegal-Gambia). France, seventeenth century was proposed  
517 as the most likely spatiotemporal candidate [38]. Based on the proposed dating, a tentative dating  
518 of the most recent ancestor of the A.Br.011/009 polytomy to the One Hundred Years War between  
519 France and England, AD 1350-1450 was further hypothesized [38].

520         However, this proposition does not fit well with the present report showing a remarkable  
521 intermingling of Italian and French strains early during the emergence of the A.Br.011/009  
522 polytomy. Rather this intermingling would indicate that the A.Br.011/009 emerged in a time of  
523 conflicts between Italy and France, rather than France and England, before the seventeenth  
524 century. Years 1250-1300 and years 1450-1550 are two candidate periods. Battles at that time  
525 involved thousands of horses. We speculate that such events provided major opportunities for  
526 contaminations of both cavalries with the same population of strains. These large “flocks” will  
527 then spread the contamination on their way back.

528           In contrast to the A.Br.011/009 polytomy, the A.Br.008/011 polytomy is characterized by  
529 a remarkable geographic spreading. Rare, deep branching lineages are observed in Europe (Italy,  
530 Bulgaria, France) as well as Turkey, China and Yakutia (the permafrost strains, this report). There  
531 is one major event in human history prior to the sixteenth century which could explain such a  
532 distribution, the Mongol conquests during the thirteenth century [55, 56]. Chinghis Khan  
533 assembled an empire extending from Northern China to the East side of the Caspian sea. The death  
534 of Chingis-khan in 1227 triggered the gathering of the Chingizids Armies for the election of  
535 Ögedei as new khan, and the death of Ögedei in 1241 eventually triggered a new gathering in  
536 1246. The conquests, powered by horses, involved long-distance displacement of tens of thousands  
537 of horses. The immediate successors of Chingis-khan invaded Europe as far as Hungaria in 1237-  
538 1242 and Anatolia (Turkey) in 1241-1243.

539           The Mongol Empire began to disintegrate in the second half of the 13th century. But despite  
540 this, the territory from China to Eastern Europe remained under the rule of Chingizids, and Eastern  
541 Europe was constantly subjected to raids from the Golden Horde for the purpose of plundering, or  
542 simply the presence of military contingents participating in wars. Thus, a common political space  
543 was established, ensuring relatively large movements of people and animals between Asia and  
544 Europe, which could further contribute to the relatively rapid and unhindered transfer of pathogens  
545 of infectious diseases between these regions. In addition to military operations, the Mongols  
546 organized a Yam - chain of relay stations at certain distances to each other, allowing to replace  
547 horses for messengers or messengers themselves, and making possible to deliver cargo and  
548 documents within weeks over long distances. This postal system also could promote rapid spread  
549 of infections, but to a much lesser extent than the massive movements of armies driven by horses.

550           The presence of Chingizids in the European region ceased when Russian Tsar Ivan the  
551 fourth (Ivan the Terrible) conquered Western states, which were formed after the split of the  
552 Golden Horde - the Kazan Khanate in 1552, the Astrakhan Khanate in 1556 and the Siberian  
553 Khanate in 1582-1598. After that, the only post-Mongolian state remained the Crimean Khanate,

554 which regularly carried out raids on Russia and Poland (the territories of modern Russia, Ukraine,  
555 Belarus, Lithuania, Latvia, Estonia and Moldova) until it was conquered by Catherine the Great in  
556 1783. Despite the active raid policy of the Crimean Khanate and the constant use of the Tatar  
557 contingents by the Moscow tsars in the course of constant wars in eastern and northern Europe,  
558 the continuity of migration routes of nomads from Asia to Europe was broken.

559         Consequently we propose here that the root of the A.Br.008/011 polytomy corresponds to  
560 a *B. anthracis* ecotype present in the Mongolian armies between the first half of the 13<sup>th</sup> century  
561 and the middle of the 16<sup>th</sup> century. We particularly favor the first half of the 13<sup>th</sup> century as the  
562 period when *B. anthracis* could have been transported in a short time-frame by the animals  
563 associated with the Mongolian armies, particularly war and led horses in all geographic areas  
564 covered by the deep branching lineages of the A.Br.008/011 polytomy, i.e. from China to  
565 Hungaria. After that time, we speculate that the split of the Mongolian empire would have  
566 significantly hindered the spread of the infection.

567         In contrast with this relatively precise dating hypothesis, we see at present no clue  
568 regarding the geographic origin of the ancestor of the A.Br.008/011 polytomy. The contamination  
569 of the Mongolian army might have occurred in many locations, including Eastern Europe.

## 570         **Apparent contradiction between the dating of the emergence of** 571         **the A.Br.011/008 polytomy and of the permafrost samples**

572         Under the proposed hypothesis, the A.Br.011/008 polytomy can be conservatively dated  
573 from the early 13<sup>th</sup> century to the middle of the 16<sup>th</sup> century. The deposition of the A.Br.011/008  
574 strains including the one represented by 4Ya recovered from permafrost at a depth of two and three  
575 meters would be posterior to this period. The 3Ya sublineage is even more recent, the relative  
576 length of the branch is less than half the total length of lineage L6\_Tsiantowskii to which it  
577 belongs.

578         The Yakoutia permafrost soil samples were taken from alluvial (river) sediments - there is  
579 a wide flat valley with bayou lakes. Probably this corresponds to holocene sediments (age about

580 10,000 years), frozen as they accumulated. A layer of permafrost formed simultaneously in  
581 Yakutia and Yamal 20-40 thousand years ago. Radiocarbon analysis of other sediments sampled  
582 in Uyandina riverside and other places of Abyisk district at the same depth, indicated that they  
583 were 3-10 thousand years old [57]. On average, in Yakutia, the depth of seasonal thawing does not  
584 exceed 2 - 2.5 meters. Therefore we expected that strains of *B. anthracis*, isolated from the  
585 permafrost, would be significantly older. However, the accidental nature of the exceptional  
586 paleontological finding in Yakutia, and the extraction of paleontological material and soil samples  
587 by prospectors rather than professional paleontologists or geologists, may be responsible for a  
588 weak geological information about the soil layers from which the strains were extracted. The  
589 finding of *B. anthracis* was quite unexpected and was triggered by the cave lions investigation,  
590 and some time passed between the excavation of the cave lions and the soil sampling.

591 We also carefully examined the extent to which the present findings could be the result, or  
592 be affected, by contaminations of different kinds. However, the possibility that the strains were  
593 introduced into the soil samples under study as a result of contamination during work is most  
594 unlikely. Drift of spores from the surface is unlikely, because of the absence of reported cases at  
595 the sampling site recently and in view of the absence of *B. anthracis* spores in the upper (minus 1  
596 meter) sample. Most importantly the initial identification of *B. anthracis* was made in a laboratory  
597 which does not work with pathogenic microorganisms and does not maintain such strain  
598 collections. The contamination in SRCAMB is also very unlikely as it would require a  
599 simultaneous contamination with three different strains in only three samples. In addition and most  
600 convincingly, whole genome sequence analysis of strains from the SRCAMB collection showing  
601 a similar MLVA genotype demonstrated that these are definitely different strains.

602 A number of conclusions can thus be robustly drawn. We looked for the presence of *B.*  
603 *anthracis* spores over a depth of six meters, going from one meter below surface down to the cave  
604 lion kittens. The state of preservation of the kittens indicated that the bodies, and the corresponding  
605 permafrost layer, remained frozen for thousands of years. Under these conditions, the most



606 parsimonious explanation for the finding of *B. anthracis* strains only in the upper layers is that *B.*  
607 *anthracis* was not present in the region at the time of the death of the kittens, 5000 to 10,000  
608 thousand years ago. Rather *B. anthracis* arrived relatively recently in three occasions represented  
609 by three distinct lineages. This diversity cannot be the result of pathogen evolution in the soil. The  
610 three genotypes are clearly positioned in different places of the *B. anthracis* evolutionary tree.  
611 Thus, all three strains most likely hit the ground and were conserved at different times, during  
612 various epizootics. The lack of a clear stratigraphy, that is, the isolation of isolates that represent  
613 a single genotype from soil samples from different depths, and more importantly the finding of  
614 spores lower than expected from the proposed dating would imply that microorganisms are able  
615 to migrate in permafrost. This would be compatible with current knowledge on permafrost [58,  
616 59].

## 617 **Explaining the close relationship between the Yamal and** 618 **Yakoutia *B. anthracis* strains**

619 One surprising observation in our study is the fairly close genetic relationship of the Yamal  
620 isolates with the Yakut strain 5Ya. Between the regions where these strains were isolated lies a  
621 distance of about 2 thousand kilometers. However, despite their remoteness from each other, they  
622 are located at similar longitude, and the ecosystems located in them are almost identical. In this  
623 connection it can be assumed that these strains are representatives of a certain "tundra" population  
624 of *B. anthracis*, spread on a significant territory of Northern Eurasia, at least in the past. In this  
625 case, the circulation of strains could be ensured by migration of ungulate populations, primarily  
626 reindeer.

627 The territory of Yakutia was inhabited by modern humans at least from the Mesolithic, but  
628 before the beginning of the 2nd millennium AD it was inhabited exclusively by tribes of hunters  
629 and fisher-men. The first population of herders, the ancestors of modern Yakuts, migrated here  
630 only at the beginning of the second millennium from the Baikal region. They were livestock

631 breeders, bred cows and horses (in the Baikal region they also bred sheep and camels, but it is  
632 impossible to breed them in the territory of Yakutia due to the severe climate).

633         The conquest by the Mongols of southern Siberia, slightly increased the migration  
634 movement from Baikal region. Tribes with domestic reindeer that came from the south of Siberia  
635 (Baikal region), by the middle of the second millennium AD reached the territory of western  
636 Siberia, which includes the Yamal Peninsula, and the north of Eastern Siberia - Yakutia. In western  
637 Siberia, these were the ancestors of the Nenets, in the eastern of the Evenks. Theoretically, it can  
638 be assumed that in the middle of the 2nd millennium AD those and others could contact somewhere  
639 in the area of the Yenisei basin, south of Taimyr, for example, in the Turukhansk district, from  
640 where a route to the Yamal is possible. At that time reindeers were mainly used for transportation  
641 and the number of domestic deers was low. Until the 17th century there were no large herds, the  
642 maximum livestock in one farm could reach one hundred heads of deer. Large-herd reindeer  
643 herding developed only after the colonization of Siberia by Russians, beginning from the 17th and  
644 18th centuries. Currently, the number of herds in one farm reaches several thousand heads. More  
645 knowledge on *B. anthracis* strains present in Northern Europe and Siberia will help better  
646 understand the history of *B. anthracis* spreading among reindeers.

647         Only in the middle of the 20th century, in connection with the beginning of mass  
648 vaccination of reindeer and the introduction of veterinary and sanitary control, obstacles arose for  
649 the free distribution of *B. anthracis* in the tundra zone. However, considering the ability of *B.*  
650 *anthracis* to form endospores and the presence of permafrost, capable of preserving these spores,  
651 further increasing the period of their viability, multiple soil foci could have formed by this time  
652 scattered over a vast territory. This territory is very little involved in economic activity and is  
653 extremely poorly populated (for example, the average population density in Yakutia is 0.3 people  
654 per square kilometer; since two thirds of the population lives in cities, the density in rural areas is  
655 only about 0.1 person per square kilometer). This makes not only sanitation, but even detection  
656 and recording of such foci an impossible task. The events of the summer of 2016 in Yamal have

657 shown that such foci retain their epidemiological potential for a long time, and under favorable  
658 conditions, primarily in the thawing of permafrost due to local or global warming, they can become  
659 a source of infection, causing large-scale epidemics, resulting in casualties and significant  
660 economic costs. A reactivated focus may remain active for some years. In 2017 32 samples from  
661 the Yamal 2016 epidemic area were tested. Two samples - ash from the place of a dead deer  
662 burning (lat. N68.24010, lon. E71.01.200) and the biological material from not completely burnt  
663 deer (lat. N68.24989, lon. E70.44435) – containing PCR detectable *B. anthracis* DNA detected in  
664 PCR. Virulent bacteria could be cultivated from both samples. The MLVA genotype was identical  
665 to the strains previously isolated in the epidemic area in 2016 [60].

666 If spores were able to keep viability during a year on the soil surface, then there is little  
667 doubt that during seasonal snow melting they could be spread over a large area and penetrate into  
668 the depths of the soil. Thus, in the tundra areas, where at least once an anthrax outbreak was  
669 recorded, it is necessary to conduct continuously anti-epidemic measures, such as vaccination of  
670 livestock and herdsman, as well as maintain the readiness of medical and veterinary institutions  
671 for the diagnosis of anthrax and emergency measures for detecting the disease.

## 672 **Conclusion**

673 In summary, we have detected three independent events of *B. anthracis* introduction in  
674 Northern Yakutia, stored at different depth in the permafrost. In the proposed model, the third and  
675 most recent introduction, detected at minus 2 meters, occurred as a side effect of Russian conquests  
676 and development of agriculture in the 17<sup>th</sup>-18<sup>th</sup> century. The second introduction detected at minus  
677 2 and minus 3 meters, would be the byproduct of Yakut's population migration from Lake Baikal  
678 area in the 14<sup>th</sup>-15<sup>th</sup> century. The first introduction detected at minus 4 meters, cannot be dated  
679 precisely but the location in the permafrost may indicate that it is not more than a few centuries  
680 older than the second introduction. We propose to date the emergence of the A.Br.008/011  
681 polytomy to the first half of the thirteenth century, in relation with the Mongolian conquests.

## 682 **Acknowledgements**

683 We wish to express our gratitude to Vitalii Kharkov, the Chief doctor of Center for Hygiene  
684 and Epidemiology in the Yamalo-Nenets Autonomous District for his help in organizing of  
685 sampling, Dr. Alla Ryazanova from Stavropol Anti-Plague Institute for her role in the clinical and  
686 laboratory diagnosis of anthrax during the Yamal anthrax epidemic and Dr. Oktyabrina Sofronova,  
687 the head of the Laboratory of especially dangerous infections of Center for Hygiene and  
688 Epidemiology in the Republic of Sakha (Yakutia) for samples from paleontological discovery  
689 point sent to SRCAMB. Also we show our appreciation to Dr. Victor Karlov from Department of  
690 Ethnology, Faculty of History, Moscow State University for kindly provided historical advice and  
691 to Dr. Anatoli Brouchkov, the Head of Geocryology Department, Faculty of Geology, Lomonosov  
692 Moscow State University, for his geology advice.

## 693 **References**

- 694 1. Saile E, Koehler TM. *Bacillus anthracis* multiplication, persistence, and genetic  
695 exchange in the rhizosphere of grass plants. *Appl Environ Microbiol.* 2006;72(5):3168-74. Epub  
696 2006/05/05. doi: 10.1128/AEM.72.5.3168-3174.2006. PubMed PMID: 16672454; PubMed  
697 Central PMCID: PMCPMC1472387.
- 698 2. Lembo T, Hampson K, Auty H, Beesley CA, Bessell P, Packer C, et al. Serologic  
699 surveillance of anthrax in the Serengeti ecosystem, Tanzania, 1996-2009. *Emerg Infect Dis.*  
700 2011;17(3):387-94. Epub 2011/03/12. doi: 10.3201/eid1703.101290. PubMed PMID: 21392428;  
701 PubMed Central PMCID: PMCPMC3166018.
- 702 3. Turner WC, Kausrud KL, Beyer W, Easterday WR, Barandongo ZR, Blaschke E,  
703 et al. Lethal exposure: An integrated approach to pathogen transmission via environmental  
704 reservoirs. *Sci Rep.* 2016;6:27311. Epub 2016/06/07. doi: 10.1038/srep27311. PubMed PMID:  
705 27265371; PubMed Central PMCID: PMCPMC4893621.

- 706 4. Ahsan MM, Khan MFR, Rahman MB, Hassan J, Chowdhury SMZH, Parvej MS,  
707 et al. Investigation into *Bacillus anthracis* Spore in Soil and Analysis of Environmental Parameters  
708 Related to Repeated Anthrax Outbreak in Sirajganj, Bangladesh. Thai J Vet Med. 2013;43(3):449-  
709 54. PubMed PMID: WOS:000339784200018.
- 710 5. Van Ness GB. Ecology of anthrax. Science. 1971;172:1303-7. doi: 10.1126 /  
711 science.172.3990.1303
- 712 6. Dragon DC, Rennie RP. The ecology of anthrax spores: tough but not invincible.  
713 Can Vet J. 1995;36(5):295-301. Epub 1995/05/01. PubMed PMID: 7773917; PubMed Central  
714 PMCID: PMCPMC1686874.
- 715 7. Gates CC, Elkin BT, Dragon DC. Investigation, control and epizootiology of  
716 anthrax in a geographically isolated, free-roaming bison population in northern Canada. Can J Vet  
717 Res. 1995;59(4):256-64. Epub 1995/10/01. PubMed PMID: 8548686; PubMed Central PMCID:  
718 PMCPMC1263779.
- 719 8. Elvander M, Persson B, Sternberg Lewerin S. Historical cases of anthrax in Sweden  
720 1916-1961. Transbound Emerg Dis. 2017;64(3):892-8. Epub 2015/12/17. doi:  
721 10.1111/tbed.12456. PubMed PMID: 26671241.
- 722 9. Maksimović Z, Cornwell MS, Semren O, Rifatbegović M. The apparent role of  
723 climate change in a recent anthrax outbreak in cattle. Rev Sci Tech Off Int Epiz. 2017;36(3):959-  
724 63. doi: doi/org/10.20506/rst.36.3.2727.
- 725 10. Griffin DW, Petrosky T, Morman SA, Luna VA. A survey of the occurrence of  
726 *Bacillus anthracis* in North American soils over two long-range transects and within post-Katrina  
727 New Orleans. Applied Geochemistry. 2009;24:1464–71. doi: 10.1016/j.apgeochem.2009.04.016.
- 728 11. Hugh-Jones ME, de Vos V. Anthrax and wildlife. Rev Sci Tech. 2002;21(2):359-  
729 83. Epub 2002/04/27. PubMed PMID: 11974621.
- 730 12. Blackburn JK, McNyset KM, Curtis A, Hugh-Jones ME. Modeling the geographic  
731 distribution of *Bacillus anthracis*, the causative agent of anthrax disease, for the contiguous United

- 732 States using predictive ecological [corrected] niche modeling. *Am J Trop Med Hyg.*  
733 2007;77(6):1103-10. Epub 2008/01/01. PubMed PMID: 18165531.
- 734 13. Inglesby TV, O'Toole T, Henderson DA, Bartlett JG, Ascher MS, Eitzen E, et al.  
735 Anthrax as a biological weapon, 2002: updated recommendations for management. *JAMA.*  
736 2002;287(17):2236-52. Epub 2002/05/01. PubMed PMID: 11980524.
- 737 14. Fowler RA, Shafazand S. Fowler RA, Shafazand S (2011) Anthrax Bioterrorism:  
738 Prevention, Diagnosis and Management Strategies. 2:107. doi: 10.4172/2157-2526.1000107. *J*  
739 *Bioterr Biodef.* 2011;2(2). doi: 10.4172/2157-2526.1000107.
- 740 15. Spencer RC. *Bacillus anthracis*. *J Clin Pathol.* 2003;56(3):182-7. Epub 2003/03/01.  
741 PubMed PMID: 12610093; PubMed Central PMCID: PMC1769905.
- 742 16. WHO. Anthrax in humans and animals. 4 ed. Geneva (CH): World Health  
743 Organization Press; 2008.
- 744 17. Peculi A, Campese E, Serrecchia L, Marino L, Boci J, Bijo B, et al. Genotyping of  
745 *Bacillus anthracis* Strains Circulating in Albania. *J Bioterror Biodef.* 2015;6(1). doi:  
746 10.4172/2157-2526.1000131.
- 747 18. Okello A, Welburn S, Smith J. Crossing institutional boundaries: mapping the  
748 policy process for improved control of endemic and neglected zoonoses in sub-Saharan Africa.  
749 *Health Policy Plan.* 2015;30(6):804-12. Epub 2014/07/09. doi: 10.1093/heapol/czu059. PubMed  
750 PMID: 25000963.
- 751 19. Chakraborty A, Khan SU, Hasnat MA, Parveen S, Islam MS, Mikolon A, et al.  
752 Anthrax Outbreaks in Bangladesh, 2009-2010. *Am J Trop Med Hyg.* 2012;86(4):703-10. doi:  
753 10.4269/ajtmh.2012.11-0234. PubMed PMID: WOS:000302519700024.
- 754 20. Okutani A, Tungalag H, Boldbaatar B, Yamada A, Tserennorov D, Otgonchimeg I,  
755 et al. Molecular epidemiological study of *Bacillus anthracis* isolated in Mongolia by multiple-  
756 locus variable-number tandem-repeat analysis for 8 loci (MLVA-8). *Jpn J Infect Dis.*  
757 2011;64(4):345-8. Epub 2011/07/27. PubMed PMID: 21788715.

- 758           21.    Cherkasskiy BL. A national register of historic and contemporary anthrax foci. J  
759    Appl Microbiol. 1999;87(2):192-5. Epub 1999/09/04. PubMed PMID: 10475946.
- 760           22.    Revich BA, Podolnaya MA. Thawing of permafrost may disturb historic cattle  
761    burial grounds in East Siberia. Glob Health Action. 2011;4. Epub 2011/11/25. doi:  
762    10.3402/gha.v4i0.8482. PubMed PMID: 22114567; PubMed Central PMCID: PMC3222928.
- 763           23.    Williams PJ, Smith MW. The frozen earth: fundamentals of geocryology:  
764    Cambridge University Press; 1991 1991. 306 p. : ill. ; 25 cm p.
- 765           24.    Steven B, Leveille R, Pollard WH, Whyte LG. Microbial ecology and biodiversity  
766    in permafrost. Extremophiles. 2006;10(4):259-67. Epub 2006/03/22. doi: 10.1007/s00792-006-  
767    0506-3. PubMed PMID: 16550305.
- 768           25.    Jansson JK, Tas N. The microbial ecology of permafrost. Nat Rev Microbiol.  
769    2014;12(6):414-25. Epub 2014/05/13. doi: 10.1038/nrmicro3262. PubMed PMID: 24814065.
- 770           26.    Legendre M, Bartoli J, Shmakova L, Jeudy S, Labadie K, Adrait A, et al. Thirty-  
771    thousand-year-old distant relative of giant icosahedral DNA viruses with a pandoravirus  
772    morphology. Proc Natl Acad Sci U S A. 2014;111(11):4274-9. Epub 2014/03/05. doi:  
773    10.1073/pnas.1320670111. PubMed PMID: 24591590; PubMed Central PMCID:  
774    PMCPMC3964051.
- 775           27.    Thierry S, Tourterel C, Le Flèche P, Derzelle S, Dekhil N, Mendy C, et al.  
776    Genotyping of French *Bacillus anthracis* Strains Based on 31-Loci Multi Locus VNTR Analysis:  
777    Epidemiology, Marker Evaluation, and Update of the Internet Genotype Database. PLoS One.  
778    2014;9(6):e95131. Epub 2014/06/06. doi: 10.1371/journal.pone.0095131  
779           PONE-D-13-27818 [pii]. PubMed PMID: 24901417; PubMed Central PMCID:  
780    PMC4046976.
- 781           28.    Birdsell DN, Pearson T, Price EP, Hornstra HM, Nera RD, Stone N, et al. Melt analysis  
782    of mismatch amplification mutation assays (Melt-MAMA): a functional study of a cost-effective

- 783 SNP genotyping assay in bacterial models. PLoS One. 2012;7(3):e32866. Epub 2012/03/23. doi:  
784 10.1371/journal.pone.0032866
- 785 PONE-D-11-21413 [pii]. PubMed PMID: 22438886; PubMed Central PMCID:  
786 PMC3306377.
- 787 29. Van Ert MN, Easterday WR, Huynh LY, Okinaka RT, Hugh-Jones ME, Ravel J, et al.  
788 Global genetic population structure of *Bacillus anthracis*. PLoS One. 2007;2(5):e461. Epub  
789 2007/05/24. doi: 10.1371/journal.pone.0000461. PubMed PMID: 17520020; PubMed Central  
790 PMCID: PMC1866244.
- 791 30. Antwerpen MH, Sahl JW, Birdsell D, Pearson T, Pearce MJ, Redmond C, et al.  
792 Unexpected Relations of Historical Anthrax Strain. MBio. 2017;8(2). Epub 2017/04/27. doi:  
793 10.1128/mBio.00440-17. PubMed PMID: 28442608; PubMed Central PMCID:  
794 PMC5405232.
- 795 31. Venkateswaran K, Singh NK, Checinska Sielaff A, Pope RK, Bergman NH, van  
796 Tongeren SP, et al. Non-Toxin-Producing *Bacillus cereus* Strains Belonging to the *B. anthracis*  
797 Clade Isolated from the International Space Station. mSystems. 2017;2(3). Epub 2017/07/07. doi:  
798 10.1128/mSystems.00021-17. PubMed PMID: 28680972; PubMed Central PMCID:  
799 PMC5487513.
- 800 32. Sahl JW, Pearson T, Okinaka R, Schupp JM, Gillece JD, Heaton H, et al. A *Bacillus*  
801 *anthracis* Genome Sequence from the Sverdlovsk 1979 Autopsy Specimens. MBio. 2016;7(5).  
802 Epub 2016/09/30. doi: 10.1128/mBio.01501-16. PubMed PMID: 27677796; PubMed Central  
803 PMCID: PMC5050339.
- 804 33. Price EP, Seymour ML, Sarovich DS, Latham J, Wolken SR, Mason J, et al.  
805 Molecular epidemiologic investigation of an anthrax outbreak among heroin users, Europe. Emerg  
806 Infect Dis. 2012;18(8):1307-13. Epub 2012/07/31. doi: 10.3201/eid1808.111343. PubMed PMID:  
807 22840345; PubMed Central PMCID: PMC3414016.



- 808           34.     Keim P, Grunow R, Vipond R, Grass G, Hoffmaster A, Birdsell DN, et al. Whole  
809     Genome Analysis of Injectional Anthrax Identifies Two Disease Clusters Spanning More Than 13  
810     Years. *EBioMedicine*. 2015;2(11):1613-8. Epub 2016/02/13. doi: 10.1016/j.ebiom.2015.10.004.  
811     PubMed PMID: 26870786; PubMed Central PMCID: PMC4740342.
- 812           35.     Hanczaruk M, Reischl U, Holzmann T, Frangoulidis D, Wagner DM, Keim PS, et  
813     al. Injectional anthrax in heroin users, Europe, 2000-2012. *Emerg Infect Dis*. 2014;20(2):322-3.  
814     Epub 2014/01/23. doi: 10.3201/eid2002.120921. PubMed PMID: 24447525; PubMed Central  
815     PMCID: PMC3901468.
- 816           36.     Blouin Y, Cazajous G, Dehan C, Soler C, Vong R, Hassan MO, et al. Progenitor  
817     "*Mycobacterium canettii*" clone responsible for lymph node tuberculosis epidemic, Djibouti.  
818     *Emerg Infect Dis*. 2014;20(1):21-8. Epub 2014/02/13. doi: 10.3201/eid2001.130652. PubMed  
819     PMID: 24520560; PubMed Central PMCID: PMC3884719.
- 820           37.     Girault G, Blouin Y, Vergnaud G, Derzelle S. High-throughput sequencing of  
821     *Bacillus anthracis* in France: investigating genome diversity and population structure using whole-  
822     genome SNP discovery. *BMC Genomics*. 2014;15(1):288. Epub 2014/04/17. doi: 10.1186/1471-  
823     2164-15-288  
824           1471-2164-15-288 [pii]. PubMed PMID: 24734872; PubMed Central PMCID:  
825     PMC4023602.
- 826           38.     Vergnaud G, Girault G, Thierry S, Pourcel C, Madani N, Blouin Y. Comparison of  
827     French and Worldwide *Bacillus anthracis* Strains Favors a Recent, Post-Columbian Origin of the  
828     Predominant North-American Clade. *PLoS One*. 2016;11(2):e0146216. Epub 2016/02/24. doi:  
829     10.1371/journal.pone.0146216. PubMed PMID: 26901621; PubMed Central PMCID:  
830     PMC4763433.
- 831           39.     Kenefic LJ, Pearson T, Okinaka RT, Schupp JM, Wagner DM, Hoffmaster AR, et  
832     al. Pre-Columbian origins for North American anthrax. *PLoS One*. 2009;4(3):e4813. Epub

- 833 2009/03/14. doi: 10.1371/journal.pone.0004813. PubMed PMID: 19283072; PubMed Central  
834 PMCID: PMC2653229.
- 835 40. Kenefic LJ, Okinaka RT, Keim P. Population genetics of *Bacillus*: phylogeography  
836 of anthrax in North America. In: Robinson DA, Falush D, Feil EJ, editors. Bacterial population  
837 genetics in infectious disease. Hoboken, New Jersey: Wiley-Blackwell; 2010. p. 169-79.
- 838 41. Pullan ST, Pearson TR, Latham J, Mason J, Atkinson B, Silman NJ, et al. Whole-  
839 genome sequencing investigation of animal-skin-drum-associated UK anthrax cases reveals  
840 evidence of mixed populations and relatedness to a US case. *Microb Genom.* 2015;1(5):e000039.  
841 Epub 2015/11/07. doi: 10.1099/mgen.0.000039. PubMed PMID: 28348823; PubMed Central  
842 PMCID: PMC5320680.
- 843 42. Rouli L, MBengue M, Robert C, Ndiaye M, La Scola B, Raoult D. Genomic  
844 analysis of three African strains of *Bacillus anthracis* demonstrates that they are part of the clonal  
845 expansion of an exclusively pathogenic bacterium. *New Microbe and New Infect.* 2014;2:161-9.
- 846 43. Popova A. Opyt likvidatsii vspyshki sibirskoy yazvy na Yamale v 2016 godu (The  
847 experience of eliminating the outbreak of anthrax on Yamal in 2016) [Russian], Izhevsk, "Print-  
848 2", 2017
- 849 44. Cherkasskiy BL. Puteshestvie epidemiologa vo vremeni i prostranstve (Traveling of an  
850 epidemiologist in time and space). Voronezh2003. 638 p.
- 851 45. [17/10/2018]. Available from:  
852 [http://climatechange.igce.ru/index.php?option=com\\_docman&task=cat\\_view&gid=32&Itemid=](http://climatechange.igce.ru/index.php?option=com_docman&task=cat_view&gid=32&Itemid=75&lang=en)  
853 [75&lang=en](http://climatechange.igce.ru/index.php?option=com_docman&task=cat_view&gid=32&Itemid=75&lang=en).
- 854 46. Braun P, Grass G, Aceti A, Serrecchia L, Affuso A, Marino L, et al. Microevolution  
855 of Anthrax from a Young Ancestor (M.A.Y.A.) Suggests a Soil-Borne Life Cycle of *Bacillus*  
856 *anthracis*. *PLoS One.* 2015;10(8):e0135346. Epub 2015/08/13. doi:  
857 10.1371/journal.pone.0135346. PubMed PMID: 26266934; PubMed Central PMCID:  
858 PMC4534099.

- 859           47.     Kracalik I, Malania L, Broladze M, Navdarashvili A, Imnadze P, Ryan SJ, et al.  
860     Changing livestock vaccination policy alters the epidemiology of human anthrax, Georgia, 2000-  
861     2013. *Vaccine*. 2017;35(46):6283-9. Epub 2017/10/11. doi: 10.1016/j.vaccine.2017.09.081.  
862     PubMed PMID: 28988866.
- 863           48.     Okinaka R, Pearson T, Keim P. Anthrax, but not *Bacillus anthracis*? *PLoS Pathog*.  
864     2006;2(11):e122. Epub 2006/11/24. doi: 10.1371/journal.ppat.0020122. PubMed PMID:  
865     17121463; PubMed Central PMCID: PMCPMC1657067.
- 866           49.     Smith KL, De Vos V, Bryden HB, Hugh-Jones ME, Klevytska A, Price LB, et al.  
867     Meso-scale ecology of anthrax in southern Africa: a pilot study of diversity and clustering. *J Appl*  
868     *Microbiol*. 1999;87(2):204-7. Epub 1999/09/04. PubMed PMID: 10475949.
- 869           50.     Leendertz FH, Lankester F, Guislain P, Neel C, Drori O, Dupain J, et al. Anthrax  
870     in Western and Central African great apes. *Am J Primatol*. 2006;68(9):928-33. Epub 2006/08/11.  
871     doi: 10.1002/ajp.20298. PubMed PMID: 16900500.
- 872           51.     Hoffmaster AR, Hill KK, Gee JE, Marston CK, De BK, Popovic T, et al.  
873     Characterization of *Bacillus cereus* isolates associated with fatal pneumonias: strains are closely  
874     related to *Bacillus anthracis* and harbor *B. anthracis* virulence genes. *J Clin Microbiol*.  
875     2006;44(9):3352-60. Epub 2006/09/07. doi: 10.1128/JCM.00561-06. PubMed PMID: 16954272;  
876     PubMed Central PMCID: PMCPMC1594744.
- 877           52.     Blouin Y, Hauck Y, Soler C, Fabre M, Vong R, Dehan C, et al. Significance of the  
878     identification in the Horn of Africa of an exceptionally deep branching *Mycobacterium*  
879     *tuberculosis* clade. *PLoS One*. 2012;7(12):e52841. Epub 2013/01/10. doi:  
880     10.1371/journal.pone.0052841  
881     PONE-D-12-22563 [pii]. PubMed PMID: 23300794; PubMed Central PMCID:  
882     PMC3531362.
- 883           53.     Blouin Y. A new scenario for the early evolution of *Mycobacterium tuberculosis*:  
884     University Paris-Saclay; 2014.

- 885           54.    Ågren J, Finn M, Bengtsson B, Segerman B. Microevolution during an Anthrax  
886 outbreak leading to clonal heterogeneity and penicillin resistance. PLoS One. 2014;9(2):e89112.  
887 Epub 2014/02/20. doi: 10.1371/journal.pone.0089112. PubMed PMID: 24551231; PubMed  
888 Central PMCID: PMC3923885.
- 889           55.    Saunders JJ. The History of the Mongol Conquests. Philadelphia, Pennsylvania  
890 19104 4011: University of Pennsylvania Press; 2001. XIX-275 p.
- 891           56.    Büntgen U, Di Cosmo N. Climatic and environmental aspects of the Mongol  
892 withdrawal from Hungary in 1242 CE. Sci Rep. 2016;6:25606. Epub 2016/05/27. doi:  
893 10.1038/srep25606. PubMed PMID: 27228400; PubMed Central PMCID: PMC4881396.
- 894           57.    Kospokevich V, Dneprovskaya O. Radio carbon data of the laboratory of  
895 geochemistry of the institute of permafrost of the USSR Academy of Sciences, Message XI  
896 [Russian]. Bulletin of the commission on studying of the Quarterny period. 1984;53:139-42.
- 897           58.    Dash JG, Fu H, Wettlaufer JS. The premelting of ice and its environmental  
898 consequences. Rep Prog Phys. 1995;58:115-67. doi: 10.1088/0034-4885/58/1/003.
- 899           59.    Stähli M, Jansson P-E, Lundin L-C. Soil moisture redistribution and infiltration in  
900 frozen sandy soils. Water Resour Res. 1999;35:95–103.
- 901           60.    Savinych AV, Pavlov DL, Kuznetsovskiy AV, Fomenkov OO, Tumanov AS,  
902 Susloparov AA, et al. The results of the monitoring of anthrax death fields of the 2016 epizootic  
903 in the Yamal district of the Yamalo-Nenets Autonomous District [Russian]. Vestnik voysk RKhB  
904 zachity (Bulletin of RCB protection forces). 2017;1(3):18-27.

## 905           **Supporting information caption**

906           **S1 Table. The MLVA profiles of described strains**

907           **S2 Table LD50 values of studied strains for mice and guinea pigs**







■ A.Br.WNA

- A.Br.011/009\_L1
- A.Br.011/009\_L2
- A.Br.011/009\_L3
- A.Br.011/009\_L3\_PasteurII
- A.Br.011/009\_L4
- A.Br.011/009\_L5
- A.Br.011/009\_L6
- A.Br.WNA

bioRxiv preprint doi: <https://doi.org/10.1101/486290>; this version posted December 3, 2018. The copyright holder for this preprint (which was not certified by peer review) is the author/funder, who has granted bioRxiv a license to display the preprint in perpetuity. It is made available under aCC-BY 4.0 International license.

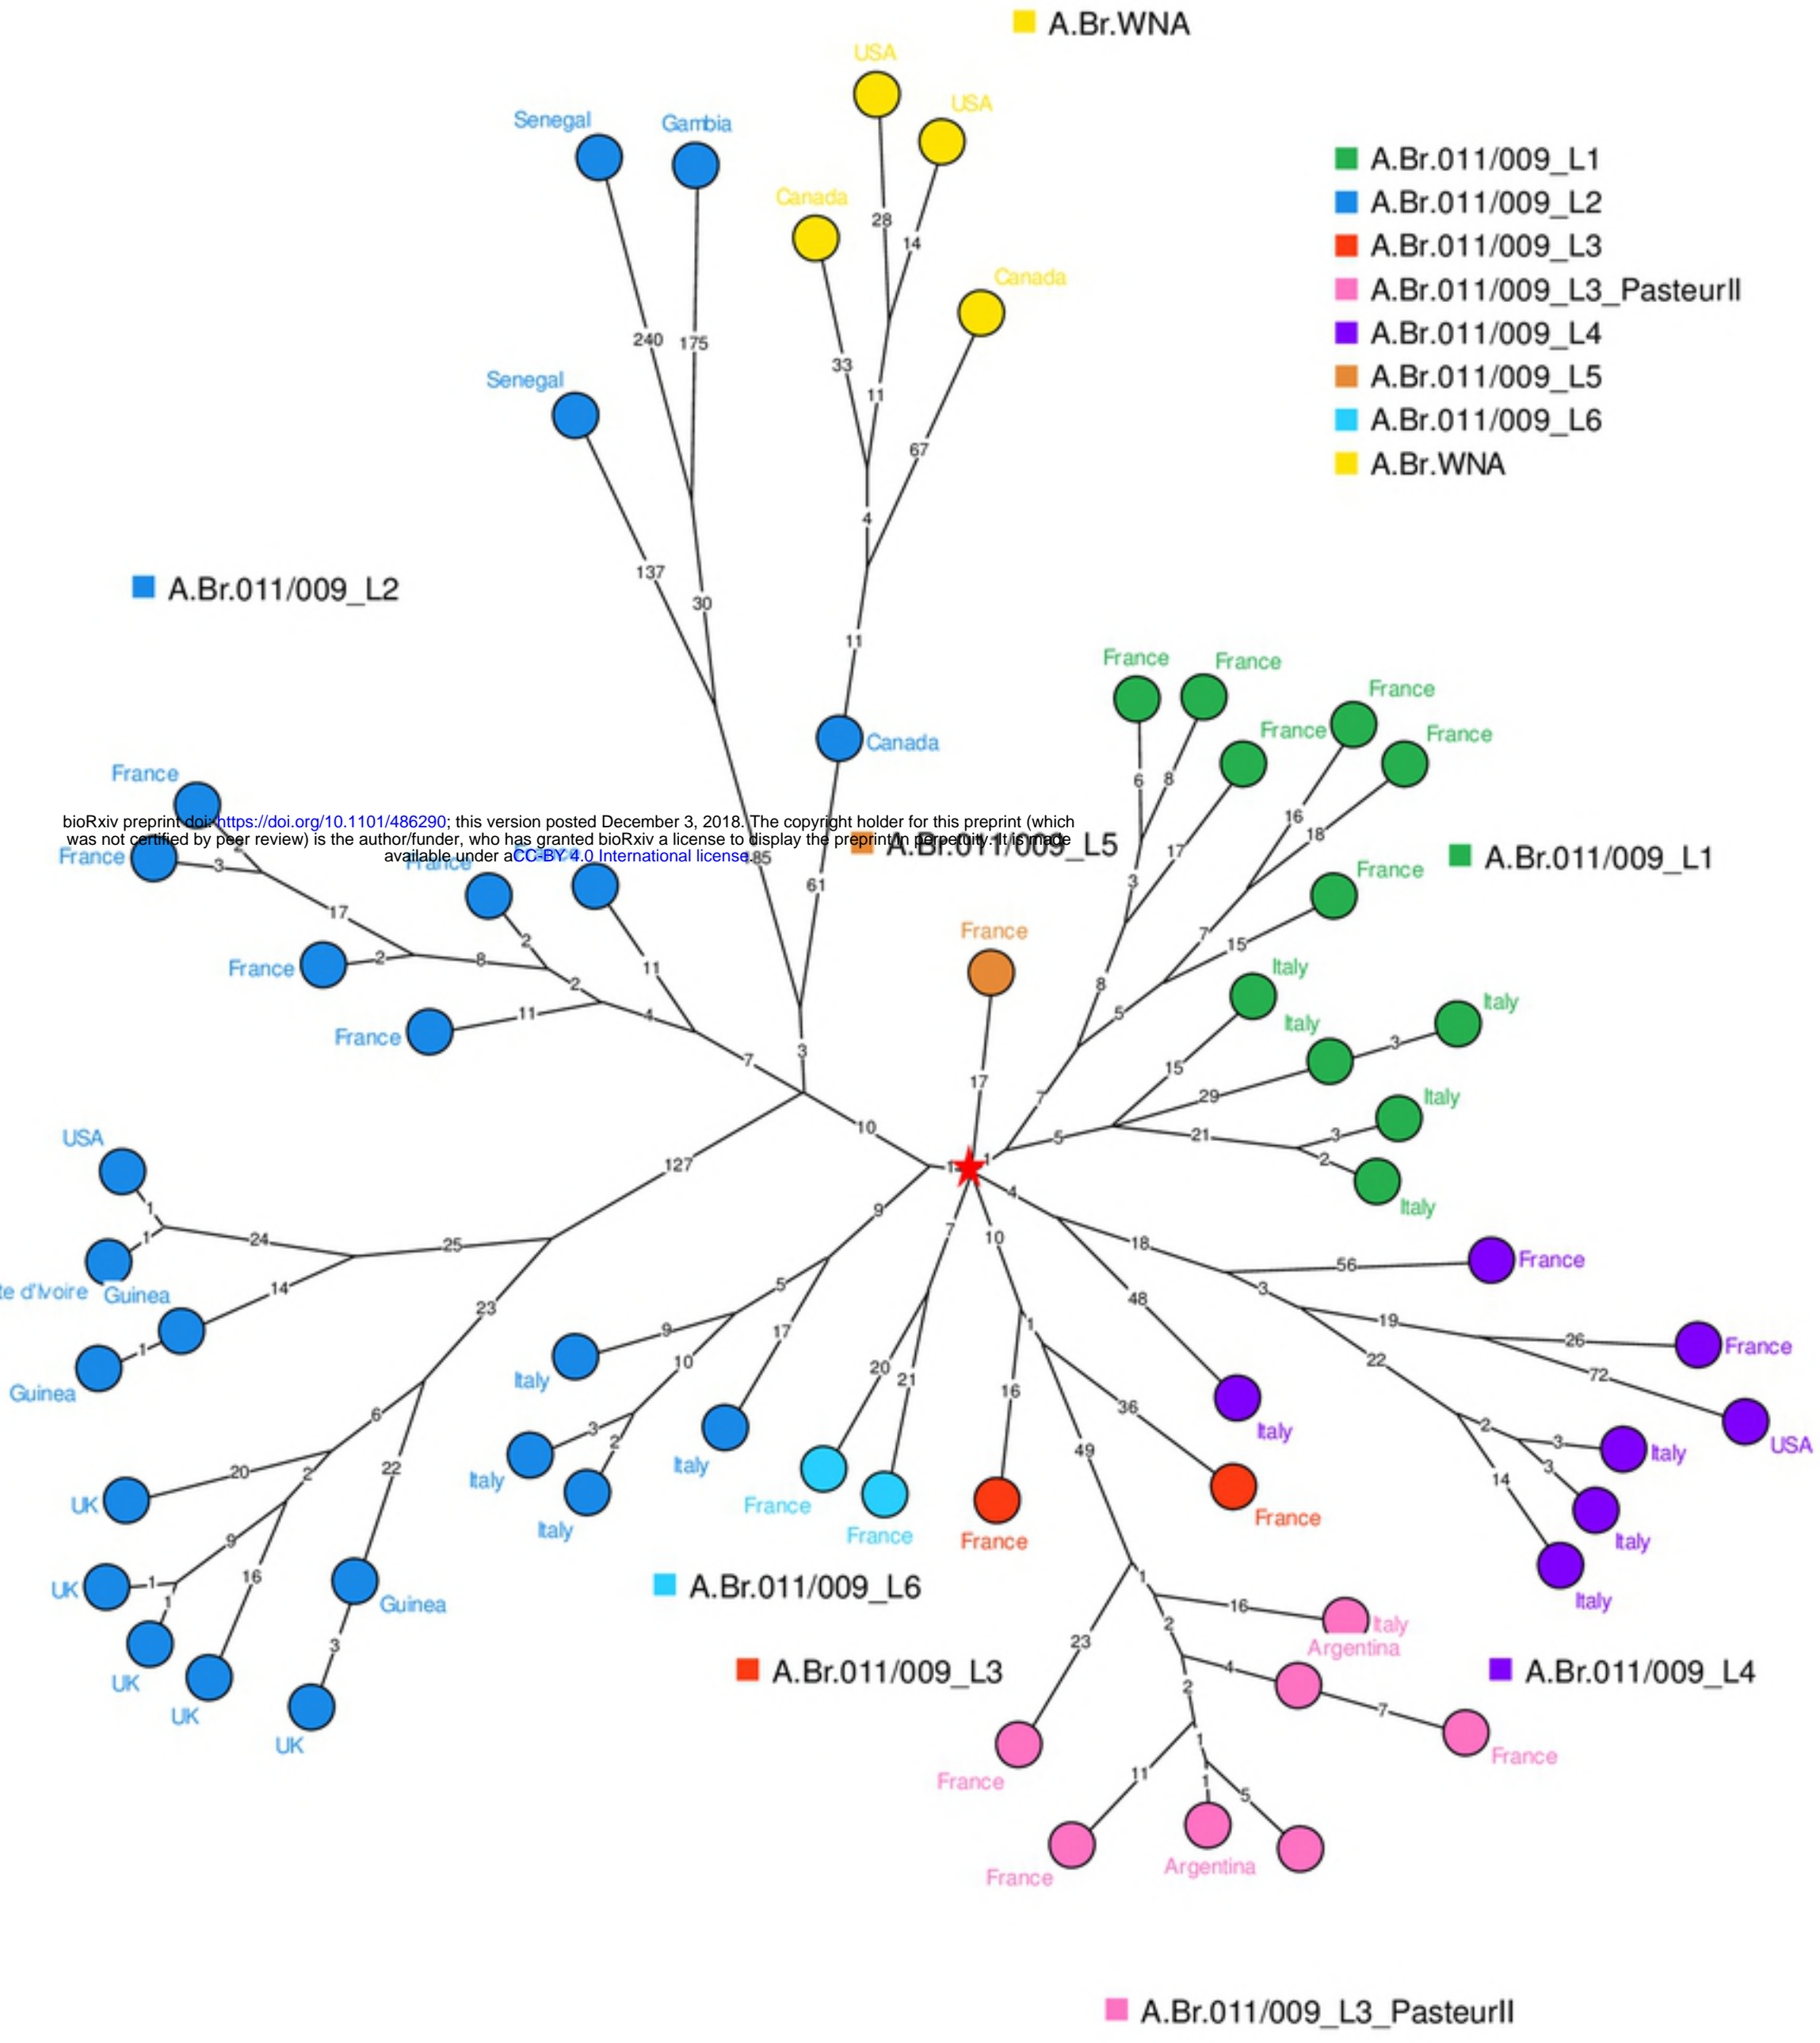

Figure
